# Supplementary material for: The shape of cleaved tethered membranes
Source: Royal Society of Chemistry journal article supplement (doi:10.1039/d4sm01225a), 2025-01-01
Supplement: d4sm01225a1.pdf [file d4sm01225a1.pdf]

## Supplemental Material: The shape of cleaved tethered membranes

A. D. Chen<sup>1</sup>, M. C. Gandikota<sup>1,2</sup> and A. Cacciuto<sup>1</sup>

<sup>1</sup>*Department of Chemistry, Columbia University  
 3000 Broadway, New York, NY 10027*

<sup>2</sup>*International Centre for Theoretical Sciences, Tata Institute of Fundamental Research, Bengaluru 560089, India*

### I. RADIUS OF GYRATION AS A FUNCTION OF SYSTEM-SIZE

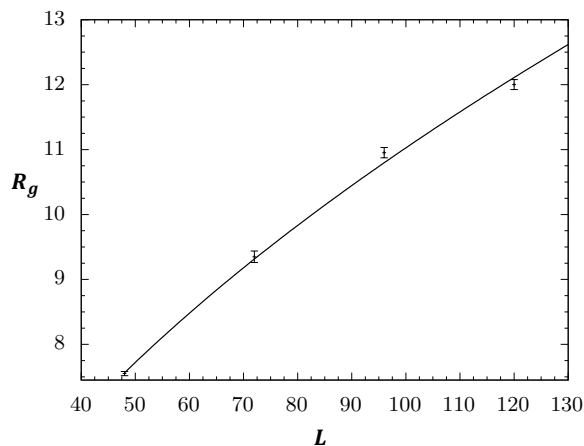

FIG. S1. Power law fit of the radius of gyration  $R_g$  of an ideal cleaved membrane as a function of the lateral size of the membrane,  $L$ . The fit has follows the functional form  $R_g \sim L^\nu$ , where  $\nu = 0.51(1)$ , consistent with ideal polymers. Here, the edge-width  $d_e$  and strip-width  $w$  were both equal to 2, while  $\kappa = k_B T$ .

### II. MASTER CURVE WITH DIFFERENT $\kappa$ SCALING

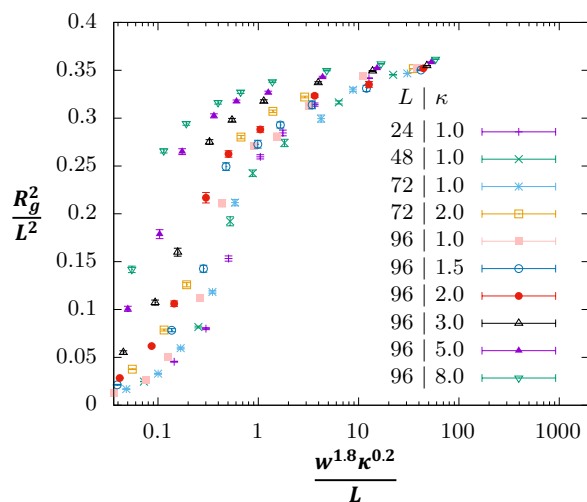

FIG. S2. The collapse of the rescaled radius of gyration as a function of  $w^{1.8}\kappa^{0.2}/L$  for different system-sizes  $L$ , bending constants  $\kappa$  and strip-widths  $w$ , as in reference [1]. It should be noted that this scaling parameter with  $\kappa^{0.2}$  does not produce as satisfactory of a collapse as compared to when  $\kappa^{1.5}$  for our data (see Fig. 3). In all cases, the edge-width  $d_e$  is set to be 2.

### III. ASPHERICITY AS A FUNCTION OF STRIP-WIDTH

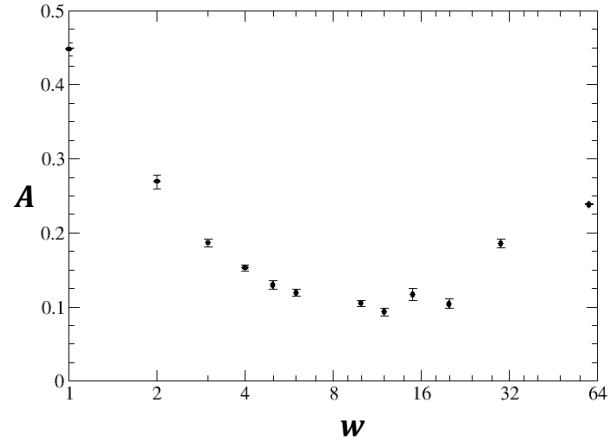

FIG. S3. Linear-log plot of self-avoiding cleaved membrane asphericity  $A$  as a function of  $w$ . Here,  $L = 60$  and  $d_e = 1$ .

### IV. RADIUS OF GYRATION AS A FUNCTION OF EDGE-WIDTH

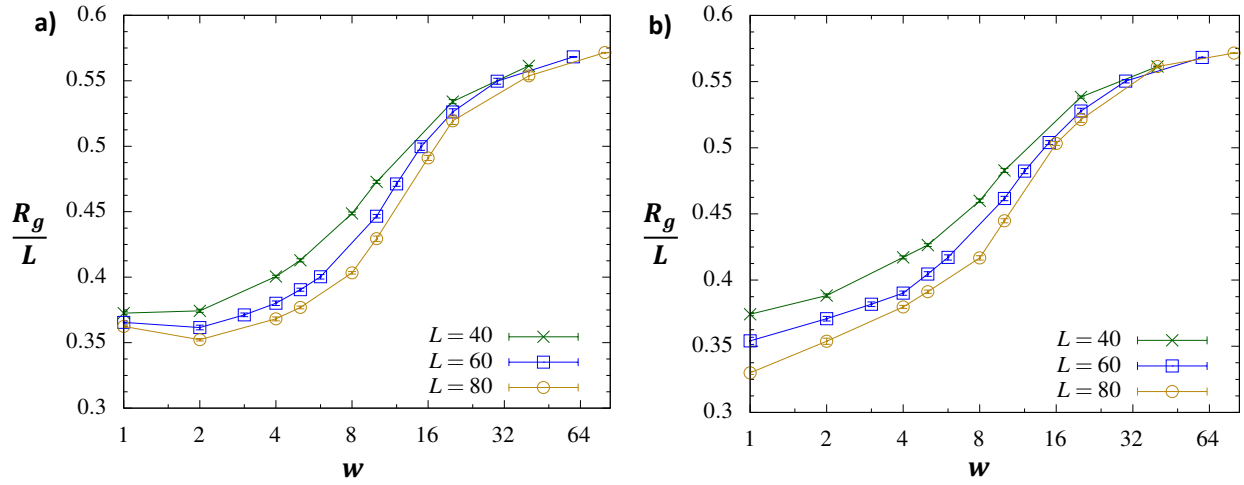

FIG. S4. Linear-log plots of  $R_g/L$  as a function of the strip width,  $w$ , for self-avoiding cleaved membranes of different side lengths  $L$ . The  $d_e$  were set to be (a) 2 or (b) 4.

---

[1] D. Yllanes, S. S. Bhabesh, D. R. Nelson and M. J. Bowick, *Nature communications*, 2017, **8**, 1381.
